# Supplementary material for: The trickle-down effect of predictability: Secondary task performance benefits from predictability in the primary task
Source: PLoS One. 2017 Jul 10;12(7):e0180573. doi: 10.1371/journal.pone.0180573 (PMC5503276; doi:10.1371/journal.pone.0180573)
Supplement: S4 Dataset — (CSV) [file pone.0180573.s005.csv]

random_d'	semi-predictable_d'	predictable_d'	random_criterion	semi-predictable_cirterion	predictable_criterion
2.09	2.41	2.09	0.52	0.36	0.52
1.1	1.77	1.66	0.8	0.04	-0.01
2.19	2.09	2.41	0.26	0.52	0.36
1.82	1.44	2.41	0.66	0.47	0.36
1.82	1.82	2.09	0.66	0.66	0.52
2.09	2.19	2.03	0.52	0.26	0.17
1.82	2.41	2.03	0.66	0.36	0.17
2.41	2.41	2.41	0.36	0.36	0.36
1.35	0.46	0.57	0.15	0.23	0.54
2.09	2.41	2.41	0.52	0.36	0.36
2.19	2.03	2.03	0.26	0.17	0.17
1.88	1.82	2.41	0.41	0.66	0.36
-0.4	-0.72	-0.35	-0.73	-1.2	-1.01
0.12	-0.51	-0.72	-0.78	-1.1	-1.2
1.88	2.41	2.19	0.41	0.36	0.26
1.15	1.57	1.77	0.05	0.26	0.04
2.41	2.09	1.56	0.36	0.52	0.78
1.88	2.41	2.41	0.41	0.36	0.36
1.31	0.35	1.04	0.91	1.01	1.04
-0.21	-0.72	-0.3	-0.95	-1.2	-0.67
2.09	1.88	1.35	0.52	0.41	0.68
2.41	2.19	2.03	0.36	0.26	0.17
1.82	1.82	2.09	0.66	0.66	0.52
-0.68	-0.72	-0.72	-0.59	-1.2	-1.2
1.66	1.66	1.66	-0.01	-0.01	-0.01
0.99	0.77	1.06	-0.35	-0.46	-0.31
-0.09	-0.21	-0.35	-0.89	-0.95	-1.01
-0.3	-0.72	-0.35	-0.67	-1.2	-1.01
0.8	0.21	0.21	0.65	0.95	0.95
1.71	2.19	2.03	0.33	0.26	0.17
1.88	2.41	2.41	0.41	0.36	0.36
1.71	1.35	1.25	0.33	0.15	0.1
1.88	1.35	1.88	0.41	0.68	0.41
1.56	1.82	2.41	0.78	0.66	0.36
2.09	2.19	2.09	0.52	0.26	0.52
2.09	1.82	2.41	0.52	0.66	0.36
2.09	2.41	2.41	0.52	0.36	0.36
1.61	2.09	1.88	0.55	0.52	0.41
1.71	2.09	2.41	0.33	0.52	0.36
-0.3	-0.45	-0.3	0.69	0.3	0.37
1.3	2.19	1.71	0.4	0.26	0.33
1.61	2.41	2.41	0.55	0.36	0.36
2.09	1.89	2.09	0.52	0.1	0.52
-0.52	-0.51	0.02	-0.79	-1.1	-0.83
2.03	2.19	1.89	0.17	0.26	0.1
2.41	1.77	2.09	0.36	0.04	0.52
0.79	1.47	1.25	0.14	-0.11	0.1
2.19	2.41	2.03	0.26	0.36	0.17
2.41	1.61	2.09	0.36	0.55	0.52
-0.12	-0.21	-0.12	0.78	0.74	0.78
1.56	1.71	2.09	0.78	0.33	0.52
2.09	2.09	2.41	0.52	0.52	0.36
2.09	2.19	2.41	0.52	0.26	0.36
0.38	-0.52	-0.51	-0.65	-0.79	-1.1
1.88	2.41	2.41	0.41	0.36	0.36
1.88	2.19	1.61	0.41	0.26	0.55
-0.09	-0.72	-0.72	-0.89	-1.2	-1.2
1.61	2.41	2.09	0.55	0.36	0.52
1.45	1.57	0.97	0.2	0.26	0.23
1.56	1.56	1.04	0.78	0.78	1.04
1.56	2.41	1.71	0.78	0.36	0.33
2.09	2.41	2.41	0.52	0.36	0.36
2.41	2.41	2.41	0.36	0.36	0.36
1.61	2.03	1.82	0.55	0.17	0.66
1.61	2.03	2.41	0.55	0.17	0.36
1.66	1.56	0.68	-0.01	0.78	0.59
2.09	1.88	2.41	0.52	0.41	0.36
1.88	2.41	2.03	0.41	0.36	0.17
1.31	2.19	2.09	0.91	0.26	0.52
1.82	2.41	2.41	0.66	0.36	0.36
0	0.52	0.52	0	-0.26	-0.26
1.71	1.82	2.41	0.33	0.66	0.36
1.89	2.09	2.19	0.1	0.52	0.26
1.88	2.41	2.41	0.41	0.36	0.36
1.88	1.89	2.41	0.41	0.1	0.36
0.97	0.98	0.84	0.23	-0.03	-0.42
1.61	2.09	2.09	0.55	0.52	0.52
1.82	1.88	2.19	0.66	0.41	0.26
1.3	2.41	2.19	0.4	0.36	0.26
1.71	2.03	2.19	0.33	0.17	0.26
1.88	1.82	2.09	0.41	0.66	0.52
0.02	0.02	-0.21	-0.83	-0.83	-0.95
1.82	2.41	2.09	0.66	0.36	0.52
0.1	-0.07	-0.15	0.58	0.49	0.45
1.56	1.31	1.56	0.78	0.91	0.78
2.09	2.41	1.56	0.52	0.36	0.78
0.82	1.57	1.45	0.41	0.26	0.2
1.82	2.03	2.03	0.66	0.17	0.17
1.82	2.41	2.19	0.66	0.36	0.26
2.41	1.77	1.88	0.36	0.04	0.41
1.35	2.41	2.09	0.68	0.36	0.52
1.82	2.41	2.41	0.66	0.36	0.36
1.56	2.19	1.71	0.78	0.26	0.33
2.09	2.41	2.41	0.52	0.36	0.36
1.71	2.09	2.41	0.33	0.52	0.36
2.03	2.03	2.41	0.17	0.17	0.36
2.41	2.41	2.41	0.36	0.36	0.36
1.61	2.19	2.09	0.55	0.26	0.52
0.93	2.09	1.44	0.72	0.52	0.47
1.88	2.03	2.41	0.41	0.17	0.36
0.52	0.12	0.38	-0.26	-0.78	-0.34
1.88	2.41	2.09	0.41	0.36	0.52
1.88	1.88	1.57	0.41	0.41	0.26
0.72	0.72	0.72	1.2	1.2	1.2
-0.4	-0.35	-0.35	-0.73	-1.01	-1.01
1.61	2.09	1.44	0.55	0.52	0.47
1.44	2.41	2.09	0.47	0.36	0.52
1.18	0.63	0.75	0.34	0.06	-0.15
-0.3	-0.21	-0.72	-0.67	-0.95	-1.2
1.07	1.66	1.45	0.28	-0.01	0.2
2.09	1.88	2.09	0.52	0.41	0.52
2.03	0.72	1.66	0.17	0.36	-0.01
1.56	2.41	2.41	0.78	0.36	0.36
2.09	1.44	1.88	0.52	0.47	0.41
-0.1	-0.51	-0.21	-0.58	-1.1	-0.95
2.09	2.41	1.88	0.52	0.36	0.41
1.71	2.19	2.09	0.33	0.26	0.52
-0.4	-0.51	-0.51	-0.73	-1.1	-1.1
0.12	-0.1	0.07	-0.78	-0.58	-0.49
1.61	2.09	2.41	0.55	0.52	0.36
1.82	2.19	2.03	0.66	0.26	0.17
1.82	1.61	2.09	0.66	0.55	0.52
-0.09	-0.51	-0.72	-0.89	-1.1	-1.2
2.09	2.41	2.41	0.52	0.36	0.36
0.83	0.72	0.72	0.94	1.2	1.2
1.44	1.07	1.07	0.47	0.01	0.01
0.51	0.51	0.72	1.1	1.1	1.2
1.56	1.38	1.47	-0.06	-0.15	-0.11
2.09	2.19	2.09	0.52	0.26	0.52
2.19	2.19	2.41	0.26	0.26	0.36
1.88	2.03	1.89	0.41	0.17	0.1
-0.15	-0.3	-0.3	-0.07	-0.67	-0.67
1.35	1.38	1.56	0.15	-0.15	-0.06
